# Supplementary material for: Anti-allodynic effect of Buja in a rat model of oxaliplatin-induced peripheral neuropathy via spinal astrocytes and pro-inflammatory cytokines suppression
Source: PubMed Central journal article supplement (PMC5237549; doi:10.1186/s12906-017-1556-z), 2017-01-14

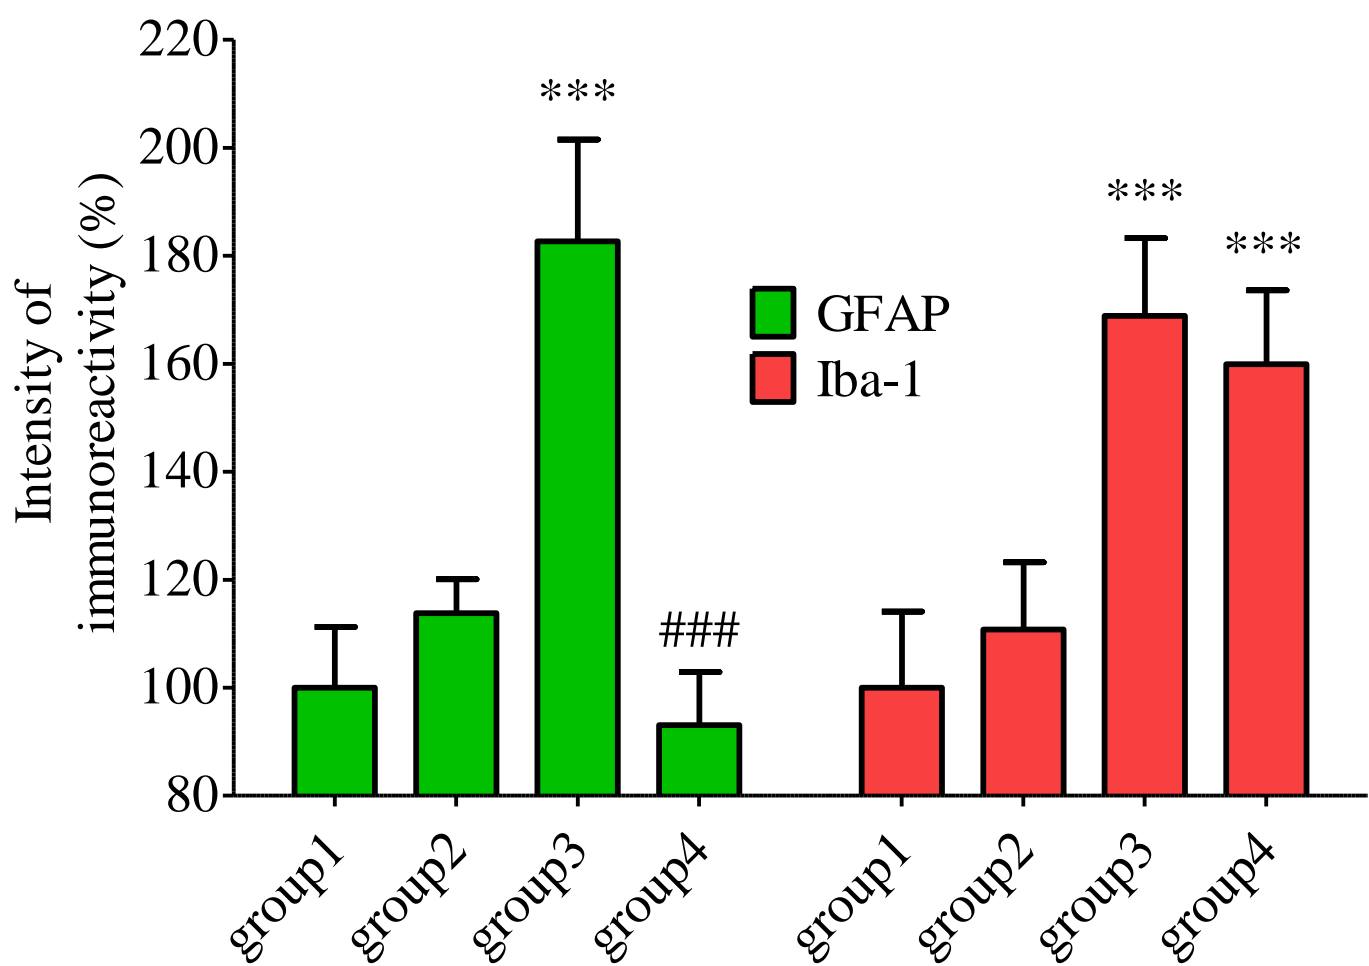

Supplement: 12906_2017_1556_MOESM1_ESM.pdf [file 12906_2017_1556_MOESM1_ESM.pdf]
