# Supplementary material for: Anti-allodynic effect of Buja in a rat model of oxaliplatin-induced peripheral neuropathy via spinal astrocytes and pro-inflammatory cytokines suppression
Source: Springer Nature journal article supplement (doi:10.1186/s12906-017-1556-z), 2017-01-14
Supplement: MOESM3 [file 11999708]

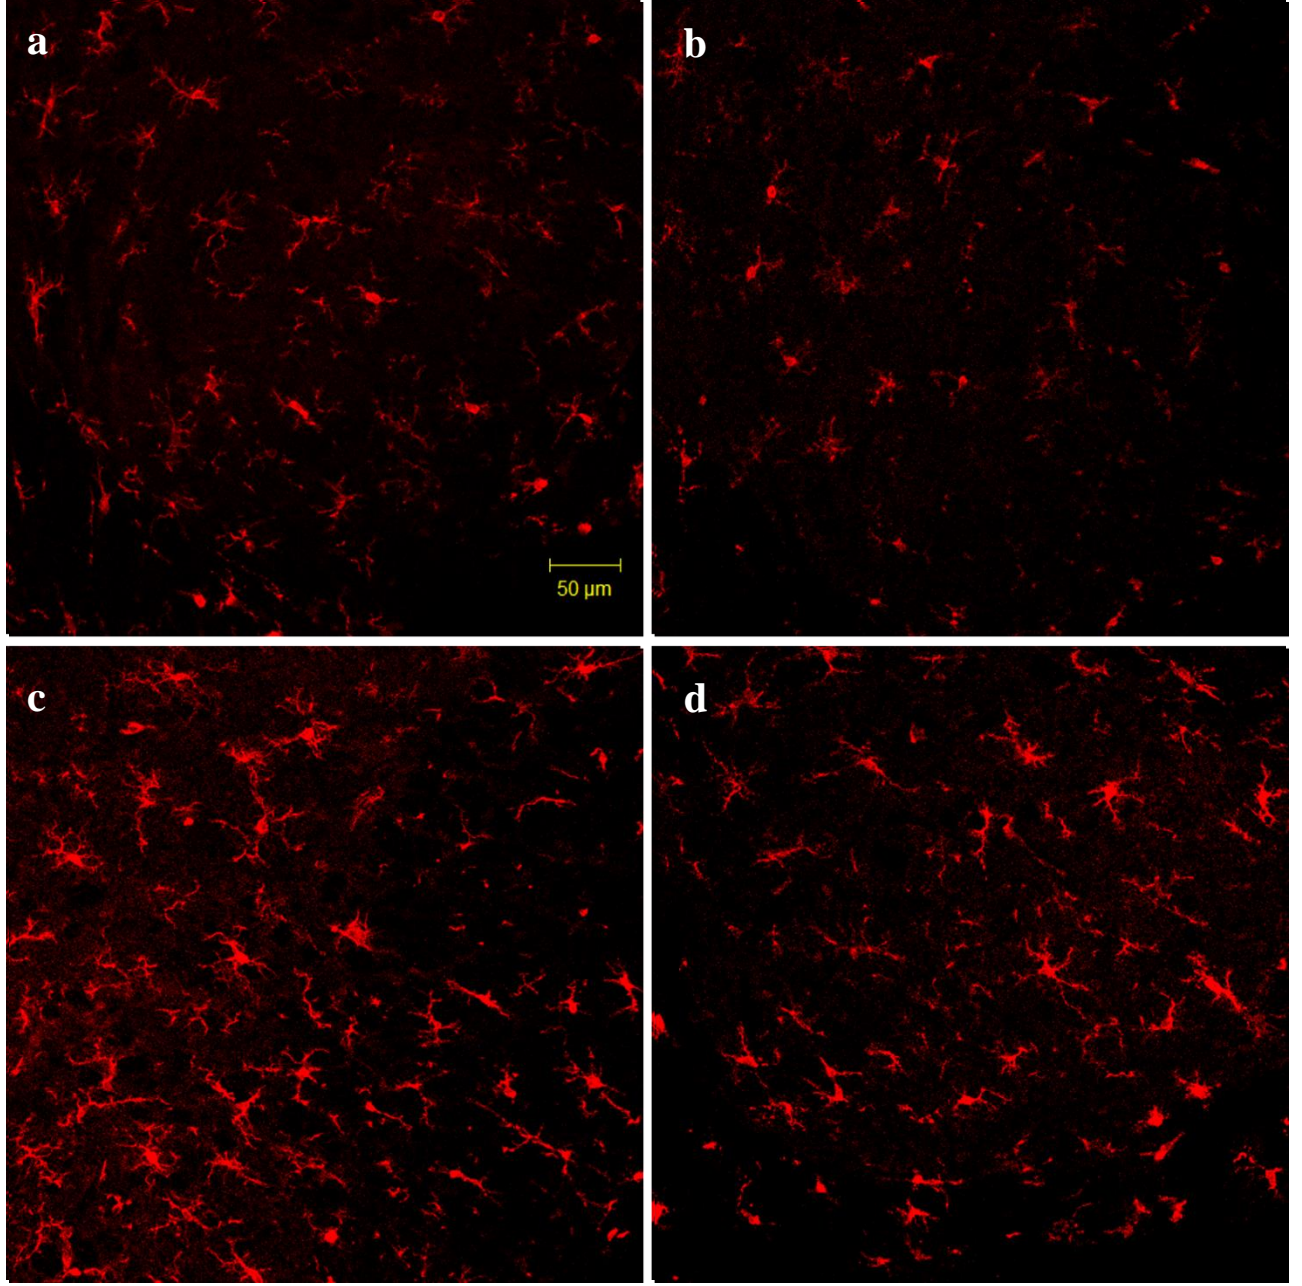

**A**

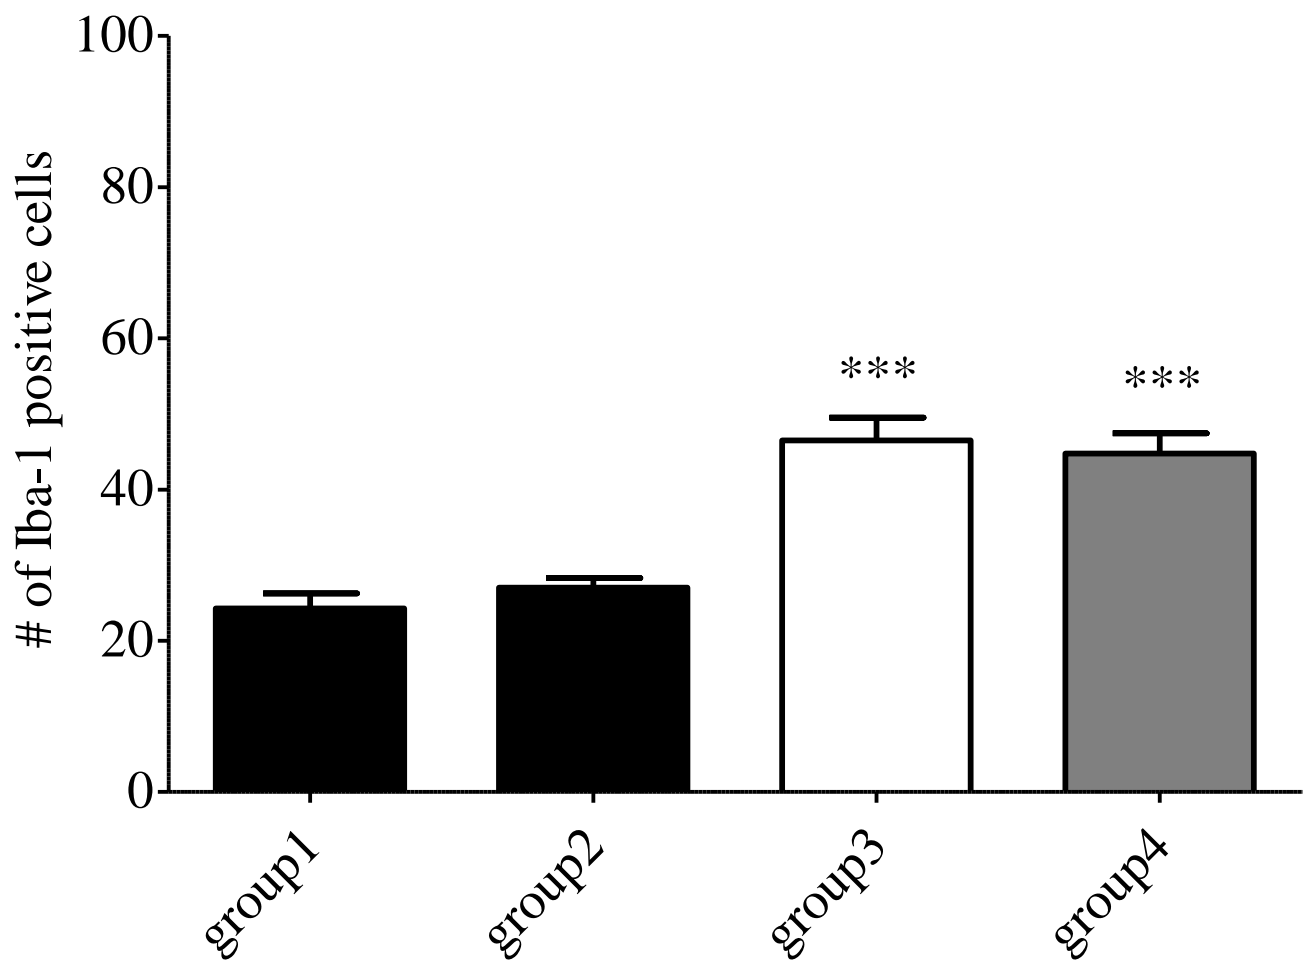

**B**
